# Supplementary material for: The Antioxidant and Proapoptotic Effects of Sternbergia clusiana Bulb Ethanolic Extract on Triple-Negative and Estrogen-Dependent Breast Cancer Cells In Vitro
Source: Plants (Basel). 2023 Jan 24;12(3):529. doi: 10.3390/plants12030529 (PMC9920827; doi:10.3390/plants12030529)
Supplement: Supplementary file 1 [file plants-12-00529-s001.zip › LCMS- Targeted compounds- Supplementary table.xlsx]

## Sheet: ExpectedCompounds
Table 1S. Targeted identification of alklaoid derivatives in ScBEE using LCMS/MS.
Parent Compound	Molecular Weight	RT [min]	Area (Max.)
Haemanthamine	287.115	2.856	2.92948e+08
Haemanthamine	287.115	2.856	2.92948e+08
Haemanthamine	287.115	2.856	2.92948e+08
Haemanthamine	287.115	2.856	2.92948e+08
Haemanthamine	287.115	2.856	2.92948e+08
Hemanthidine	287.115	2.856	2.92948e+08
Hemanthidine	287.115	2.856	2.92948e+08
Tazettine	287.115	2.856	2.92948e+08
Tazettine	287.115	2.856	2.92948e+08
Hemanthidine	301.131	5.461	6.12973e+08
Hemanthidine	301.131	5.461	6.12973e+08
Hemanthidine	301.131	5.461	6.12973e+08
Tazettine	301.131	5.461	6.12973e+08
Tazettine	301.131	5.461	6.12973e+08
Haemanthamine	287.116	23.504	2.10078e+07
Haemanthamine	287.116	23.504	2.10078e+07
Haemanthamine	287.116	23.504	2.10078e+07
Haemanthamine	287.116	23.504	2.10078e+07
Hemanthidine	287.116	23.504	2.10078e+07
Tazettine	287.116	23.504	2.10078e+07
Haemanthamine	287.116	3.074	1.0518e+07
Haemanthamine	287.116	3.074	1.0518e+07
Haemanthamine	287.116	3.074	1.0518e+07
Haemanthamine	287.116	3.074	1.0518e+07
Hemanthidine	287.116	3.074	1.0518e+07
Hemanthidine	287.116	3.074	1.0518e+07
Tazettine	287.116	3.074	1.0518e+07
Tazettine	287.116	3.074	1.0518e+07
Haemanthamine	313.131	9.563	7.74678e+07
Hemanthidine	355.105	31.382	1.46325e+07
Haemanthamine	341.09	28.75	1.75379e+07
Haemanthamine	341.09	28.75	1.75379e+07
Hemanthidine	341.09	28.75	1.75379e+07
Hemanthidine	341.09	28.75	1.75379e+07
Tazettine	341.09	28.75	1.75379e+07
Tazettine	371.137	30.839	1.65905e+07
